# Supplementary material for: Longitudinal Association of Built Environment Pattern with Physical Activity in a Community-Based Cohort of Elderly Hong Kong Chinese: A Latent Profile Analysis
Source: Int J Environ Res Public Health. 2020 Jun 15;17(12):4275. doi: 10.3390/ijerph17124275 (PMC7344458; doi:10.3390/ijerph17124275)
Supplement: Supplementary file 1 [file ijerph-17-04275-s001.pdf]

## **Online supplemental materials**

### **Longitudinal association of built environment pattern with physical activity in a community-based cohort of elderly Hong Kong Chinese: a latent profile analysis**

Jie-Sheng Lin, Faye Ya-Fen Chan, Jason Leung, Blanche Yu, Zhi-Hui Lu, Jean Woo, Timothy Kwok, Kevin Ka-Lun Lau

## Text S1. Additional information on the inverse probability weighting analysis

### Methods

For addressing bias caused by differential loss to follow-up, inverse probability weighting method [1] was used to examine the impact of differential loss to follow-up in the present study. The reasons of loss to follow-up were divided into death and other causes (e.g., refusal and inability to contact), and because determinants of death and loss to follow-up for other causes may be different, we separately modeled attrition due to death and attrition due to other causes.

First, each observation's probability of death (P1) and loss to follow-up due to other causes (P2) in each wave of follow-up were estimated by generalized estimating equation (GEE) regression models with death (yes / no) and loss to follow-up due to other causes (yes / no) as outcomes, including baseline time-constant covariates (sex, education level, years lived in Hong Kong and Community Screening Interview for Dementia), time-varying covariates (age, marital status, alcohol drinking, smoking, living alone, self-rated health, depression, Mini-Mental State Examination and number of chronic diseases), level of baseline total physical activity and built environment class as predictors. Non-stabilized inverse probability weighting was calculated as  $1 / (P1 * P2)$ . As the reciprocal of a probability, some observation's probability may potentially be very large for participants with a small probability of staying alive and being in follow-up. We further calculated stabilized weights.

Second, each observation's probability of death (S1) and loss to follow-up due to other causes (S2) in the study were estimated by GEE regression models with death (yes / no) and loss to follow-up due to other causes (yes / no) as outcomes, including sex, education level, years lived in Hong Kong, Community Screening Interview for Dementia, marital status, alcohol drinking, smoking, living alone, self-rated health, depression, Mini-Mental State Examination and number of chronic diseases (only baseline time-constant covariates) as predictors. Stabilized weights were calculated as  $(S1 * S2) / (P1 * P2)$ , and used in the main analyses.

### Reference

1. Weuve, J.; Tchetgen, E.J.T.; Glymour, M.M.; Beck, T.L.; Aggarwal, N.T.; Wilson, R.S.; Evans, D.A.; de Leon, C.F.M. Accounting for bias due to selective attrition the example of smoking and cognitive decline. *Epidemiology* **2012**, *23*, 119-128.

**Table S1.** Model fit statistics for latent profile analysis of 1 to 9 class models and class probabilities

| Fit statistics | 1 Class    | 2 Class   | 3 Class   | 4 Class   | 5 Class   | 6 Class   | 7 Class   | 8 Class   | 9 Class   |
|----------------|------------|-----------|-----------|-----------|-----------|-----------|-----------|-----------|-----------|
| Log-likelihood | -101204.08 | -98051.94 | -95832.30 | -94471.85 | -93814.94 | -92525.07 | -92337.04 | -91398.31 | -90689.96 |
| AIC            | 202448.17  | 196165.88 | 191748.61 | 189049.70 | 187757.87 | 185200.15 | 184846.08 | 182990.61 | 181595.93 |
| BIC            | 202573.77  | 196360.56 | 192012.37 | 189382.53 | 188159.79 | 185671.14 | 185386.16 | 183599.77 | 182274.16 |
| SSA-BIC        | 202510.21  | 196262.05 | 191878.91 | 189214.12 | 187956.43 | 185432.83 | 185112.89 | 183291.54 | 181930.99 |
| Entropy        |            | 0.91      | 0.90      | 0.89      | 0.85      | 0.87      | 0.88      | 0.87      | 0.89      |
| BLRT           |            | 6304.00   | 4439.38   | 1452.89   | 1731.06   | 2441.57   | 2542.62   | 779.31    | 1333.03   |
| BLRT p-value   |            | < 0.001   | < 0.001   | < 0.001   | < 0.001   | < 0.001   | < 0.001   | < 0.001   | < 0.001   |
| Prob. min      |            | 0.95      | 0.93      | 0.89      | 0.84      | 0.87      | 0.86      | 0.88      | 0.83      |
| Prob. max      |            | 0.98      | 0.96      | 0.96      | 0.97      | 0.97      | 0.96      | 0.98      | 0.97      |
| N. min         |            | 0.28      | 0.17      | 0.04      | 0.04      | 0.05      | 0.03      | 0.01      | 0.03      |
| N. max         |            | 0.72      | 0.58      | 0.53      | 0.36      | 0.29      | 0.32      | 0.28      | 0.30      |

AIC, Akaike Information Criterion; BIC, Bayesian Information Criterion; SSA-BIC, Sample-size-adjusted BIC: lower values on these fit statistics indicate better model fit.

BLRT, Bootstrap Likelihood Ratio Test: comparing the improvement between neighboring class models.

Entropy: a measure of the precision of classification, higher value indicates greater precision.

Prob. min / max: minimum / maximum of the average latent class probabilities for most likely class membership by assigned class.

N. min / max: proportion of the sample assigned to the smallest / largest class (based on most likely class membership).

**Table S2.** Adjusted HR (hazard ratio) and 95%CI (confidence interval) of attrition due to loss to follow-up over the study period <sup>a</sup>

|                                                  | Adjusted HR (95% CI)                          |                                                      |
|--------------------------------------------------|-----------------------------------------------|------------------------------------------------------|
|                                                  | Death<br>(case = 3944;<br>observation = 9921) | Other causes<br>(case = 3466;<br>observation = 8622) |
| Age, per SD, prior                               | 1.41 (1.34, 1.49) ***                         | 1.16 (1.11, 1.21) ***                                |
| Female (ref: male)                               | 0.37 (0.32, 0.42) ***                         | 1.08 (0.97, 1.20)                                    |
| Marital status, prior (ref: married)             |                                               |                                                      |
| Widowed                                          | 1.20 (1.04, 1.38) *                           | 0.95 (0.85, 1.08)                                    |
| Separated or divorced                            | 1.31 (0.94, 1.82)                             | 0.91 (0.67, 1.24)                                    |
| Single (never married)                           | 2.17 (1.59, 2.95) ***                         | 0.99 (0.70, 1.41)                                    |
| Education level, baseline (ref: no education)    |                                               |                                                      |
| Primary school or below                          | 1.18 (1.01, 1.39) *                           | 0.85 (0.76, 0.96) *                                  |
| Secondary school or above                        | 0.93 (0.77, 1.13)                             | 0.70 (0.60, 0.82) ***                                |
| Years lived in Hong Kong, per SD, baseline       | 1.10 (1.04, 1.16) **                          | 0.90 (0.86, 0.94) ***                                |
| Alcohol drinking, prior (ref: none)              | 0.96 (0.82, 1.13)                             | 1.05 (0.91, 1.21)                                    |
| Smoking, prior (ref: none)                       | 1.77 (1.46, 2.14) ***                         | 1.01 (0.81, 1.25)                                    |
| Number of chronic diseases, prior (ref: 0)       |                                               |                                                      |
| 1 or 2                                           | 1.14 (0.95, 1.38)                             | 1.23 (1.06, 1.44) *                                  |
| ≥ 3                                              | 1.55 (1.28, 1.88) ***                         | 1.45 (1.24, 1.71) ***                                |
| Self-rated health, prior                         |                                               |                                                      |
| Very poor, poor or fair                          | Ref                                           | Ref                                                  |
| Good or very good                                | 0.86 (0.77, 0.95) *                           | 0.98 (0.90, 1.08)                                    |
| Live alone, prior (ref: no)                      | 1.02 (0.86, 1.21)                             | 1.03 (0.89, 1.18)                                    |
| Depression, prior (ref: no)                      | 1.03 (0.87, 1.23)                             | 0.82 (0.69, 0.96) *                                  |
| MMSE, per SD, prior                              | 0.81 (0.76, 0.86) ***                         | 1.04 (0.98, 1.10)                                    |
| CSI-D, per SD, baseline                          | 0.83 (0.78, 0.89) ***                         | 0.85 (0.80, 0.90) ***                                |
| Total PA, per SD, baseline                       | 0.78 (0.74, 0.83) ***                         | 0.88 (0.84, 0.92) ***                                |
| Built environment class, baseline (ref: Class 1) |                                               |                                                      |
| Class 2                                          | 1.07 (0.92, 1.24)                             | 0.93 (0.83, 1.05)                                    |
| Class 3                                          | 1.08 (0.92, 1.29)                             | 0.98 (0.86, 1.12)                                    |

Abbreviations: CSI-D, Community Screening Interview for Dementia; MMSE, Mini-Mental State Examination; PA, physical activity; SD, standard deviation.

<sup>a</sup> Adjusted HR (95% CI) were estimated by generalized estimating equation with death (yes / no) and loss to follow-up due to other causes (yes / no) as outcomes. “Prior” means the predictors were treated as time-varying covariates, and “baseline” as baseline time-constant covariates.

\*  $P$ -value < 0.05, \*\*  $P$ -value < 0.01, \*\*\*  $P$ -value < 0.001

**Table S3.** Characteristics of participants and the level of physical activity over the study period

|                                       | 2001-2003<br>(N=3944)                 | 2005-2007<br>(N=3106) | 2008-2010<br>(N=1848) | 2015-2017<br>(N=1023) |
|---------------------------------------|---------------------------------------|-----------------------|-----------------------|-----------------------|
|                                       | Mean (SD), median (IQR) or number (%) |                       |                       |                       |
| Age, years                            | 72.5 (5.19)                           | 75.7 (4.92)           | 77 (4.35)             | 83.3 (3.86)           |
| Sex, female, N (%)                    | 1972 (50.0)                           | 1562 (50.3)           | 871 (47.1)            | 532 (52)              |
| Marital status, N (%)                 |                                       |                       |                       |                       |
| Married                               | 2795 (70.9)                           | 2078 (66.9)           | 1291 (69.9)           | 589 (57.6)            |
| Widowed                               | 971 (24.6)                            | 889 (28.6)            | 466 (25.2)            | 400 (39.0)            |
| Separated or divorced                 | 88 (2.2)                              | 81 (2.6)              | 65 (3.5)              | 20 (2.0)              |
| Single (never married)                | 90 (2.3)                              | 58 (1.9)              | 26 (1.4)              | 14 (1.4)              |
| Education level, N (%)                |                                       |                       |                       |                       |
| No education                          | 843 (21.4)                            | 626 (20.2)            | 292 (15.8)            | 172 (16.8)            |
| Primary school or below               | 1977 (50.1)                           | 1555 (50.0)           | 918 (49.7)            | 483 (47.2)            |
| Secondary school or above             | 1124 (28.5)                           | 925 (29.8)            | 638 (34.5)            | 368 (36.0)            |
| Years lived in Hong Kong              | 52.8 (14.9)                           |                       |                       |                       |
| Alcohol drinking, N (%)               | 515 (13.1)                            | 356 (11.5)            | 227 (12.3)            | 94 (9.2)              |
| Smoking, N (%)                        | 273 (6.9)                             | 171 (5.5)             | 67 (3.6)              | 25 (2.4)              |
| Number of chronic diseases, N (%)     |                                       |                       |                       |                       |
| 0                                     | 648 (16.4)                            | 277 (8.9)             | 154 (8.3)             | 41 (4.0)              |
| 1 or 2                                | 2182 (55.3)                           | 1422 (45.8)           | 780 (42.2)            | 435 (42.5)            |
| ≥ 3                                   | 1114 (28.3)                           | 1407 (45.3)           | 914 (49.5)            | 547 (53.5)            |
| Self-rated health, N (%)              |                                       |                       |                       |                       |
| Very poor, poor or fair               | 2082 (52.8)                           | 1545 (49.7)           | 909 (49.2)            | 559 (54.6)            |
| Good or very good                     | 1862 (47.2)                           | 1561 (50.3)           | 939 (50.8)            | 464 (45.4)            |
| Live alone, N (%)                     | 423 (10.7)                            | 437 (14.1)            | 244 (13.2)            | 170 (16.6)            |
| Depression, N (%)                     | 365 (9.3)                             | 207 (6.7)             | 76 (4.1)              | 148 (14.5)            |
| MMSE                                  | 25.6 (3.68)                           | 26.1 (3.64)           | 26.9 (3.11)           | 24.8 (4.28)           |
| CSI-D                                 | 30.2 (2.04)                           |                       |                       |                       |
| Insufficient PA, N (%), Total PA < 90 | 2223 (56.4)                           | 1316 (42.4)           | 733 (39.7)            | 738 (72.1)            |
| PASE, median (IQR)                    |                                       |                       |                       |                       |
| Total PA                              | 84.8 (50.5)                           | 95.6 (54)             | 99.1 (50)             | 68.4 (50.57)          |
| Leisure PA                            | 35.6 (34.5)                           | 51.7 (35.6)           | 45.4 (29.6)           | 28.2 (37.08)          |
| Household PA                          | 50.0 (25.0)                           | 50.0 (25.0)           | 50.0 (30.0)           | 25.0 (25.0)           |
| Walking PA                            | 25.7 (36.4)                           | 25.7 (25.7)           | 25.7 (25.7)           | 25.7 (17.13)          |

Abbreviations: CSI-D, Community Screening Interview for Dementia; IQR, interquartile range; MMSE, Mini-Mental State Examination; PASE, Physical Activity Scale for the Elderly; SD, standard deviation.

**Table S4.** Sensitivity analyses for difference in the level of physical activity (PA) change over 5 years with built environment class <sup>a</sup>

|              | Model 3<br>(case = 3944;<br>observation = 9921) | Model 3a<br>(case = 3944;<br>observation = 9921) | Model 3b<br>(case = 3737;<br>observation = 9140) | Model 3c<br>(case = 2948;<br>observation = 8696) | Model 3d<br>(case = 3944;<br>observation = 8898) | Model 3e<br>(case = 2928;<br>observation = 7649) |
|--------------|-------------------------------------------------|--------------------------------------------------|--------------------------------------------------|--------------------------------------------------|--------------------------------------------------|--------------------------------------------------|
| Total PA     |                                                 |                                                  |                                                  |                                                  |                                                  |                                                  |
| Class 2 vs 1 | 0.16 (-1.66, 1.99)                              | 0.19 (-1.62, 2.00)                               | 0.53 (-1.37, 2.43)                               | -0.14 (-2.14, 1.87)                              | 0.24 (-1.93, 2.41)                               | -0.54 (-2.71, 1.63)                              |
| Class 3 vs 1 | -0.17 (-2.27, 1.92)                             | -0.09 (-2.16, 1.99)                              | -0.03 (-2.19, 2.13)                              | -0.45 (-2.76, 1.85)                              | 0.06 (-2.42, 2.53)                               | -0.21 (-2.69, 2.28)                              |
| Class 3 vs 2 | -0.34 (-1.93, 1.25)                             | -0.28 (-1.85, 1.30)                              | -0.56 (-2.19, 1.06)                              | -0.32 (-2.07, 1.43)                              | -0.18 (-2.05, 1.68)                              | 0.33 (-1.59, 2.26)                               |
| Leisure PA   |                                                 |                                                  |                                                  |                                                  |                                                  |                                                  |
| Class 2 vs 1 | -0.26 (-1.43, 0.91)                             | -0.21 (-1.36, 0.94)                              | -0.02 (-1.25, 1.22)                              | -0.34 (-1.62, 0.94)                              | 0.40 (-0.91, 1.71)                               | -0.63 (-2.00, 0.75)                              |
| Class 3 vs 1 | 0.68 (-0.66, 2.03)                              | 0.69 (-0.63, 2.01)                               | 0.85 (-0.55, 2.25)                               | 0.60 (-0.87, 2.07)                               | 1.28 (-0.22, 2.77)                               | 0.56 (-1.02, 2.13)                               |
| Class 3 vs 2 | 0.94 (-0.08, 1.97)                              | 0.90 (-0.11, 1.90)                               | 0.87 (-0.19, 1.92)                               | 0.94 (-0.18, 2.06)                               | 0.88 (-0.25, 2.00)                               | 1.18 (-0.03, 2.40)                               |
| Household PA |                                                 |                                                  |                                                  |                                                  |                                                  |                                                  |
| Class 2 vs 1 | 0.44 (-0.64, 1.51)                              | 0.41 (-0.65, 1.47)                               | 0.54 (-0.58, 1.66)                               | 0.27 (-0.90, 1.45)                               | -0.22 (-1.48, 1.05)                              | 0.29 (-0.98, 1.57)                               |
| Class 3 vs 1 | -0.83 (-2.06, 0.40)                             | -0.78 (-1.99, 0.44)                              | -0.77 (-2.04, 0.51)                              | -0.97 (-2.32, 0.39)                              | -1.25 (-2.70, 0.19)                              | -0.62 (-2.09, 0.84)                              |
| Class 3 vs 2 | -1.26 (-2.20, -0.33) **                         | -1.19 (-2.11, -0.27) *                           | -1.31 (-2.27, -0.35) **                          | -1.24 (-2.27, -0.21) *                           | -1.04 (-2.13, 0.05)                              | -0.92 (-2.05, 0.22)                              |
| Walking PA   |                                                 |                                                  |                                                  |                                                  |                                                  |                                                  |
| Class 2 vs 1 | -0.46 (-1.33, 0.42)                             | -0.39 (-1.25, 0.47)                              | -0.27 (-1.19, 0.65)                              | -0.54 (-1.49, 0.40)                              | 0.12 (-0.81, 1.06)                               | -0.67 (-1.69, 0.35)                              |
| Class 3 vs 1 | 0.73 (-0.27, 1.73)                              | 0.77 (-0.21, 1.75)                               | 0.95 (-0.10, 2.00)                               | 0.67 (-0.42, 1.76)                               | 1.18 (0.12, 2.25) *                              | 0.73 (-0.44, 1.90)                               |
| Class 3 vs 2 | 1.19 (0.42, 1.95) **                            | 1.16 (0.42, 1.90) **                             | 1.22 (0.44, 2.01) **                             | 1.21 (0.38, 2.04) **                             | 1.06 (0.26, 1.85) **                             | 1.39 (0.49, 2.30) **                             |

<sup>a</sup>  $\beta$  (95% confidence interval) were estimated from weighted linear mixed-effects models.

Model 3: including age, built environment class and their interaction term (age\*built environment class), and adjusted for sex, marital status, education level, alcohol drinking, smoking, years lived in Hong Kong, living alone, self-rated health, depression, Mini-Mental State, Examination Community Screening Interview for Dementia, number of chronic diseases and level of baseline total, leisure, household and walking physical activity, respectively.

Model 3a: repeated analyses of model using unweighted linear mixed-effects models;

Model 3b: repeated analyses of model after excluding participants who reported moving from the baseline address during follow-up;

Model 3c: repeated analyses of model after excluding participants who loss to follow-up within 4 years after baseline;

Model 3d: repeated analyses of model after excluding observation in 2015-2017 follow-up;

Model 3e: repeated analyses of model after excluding participants who reported a functional impairment.

\*  $P$ -value<0.05, \*\*  $P$ -value <0.01, \*\*\*  $P$ -value <0.001

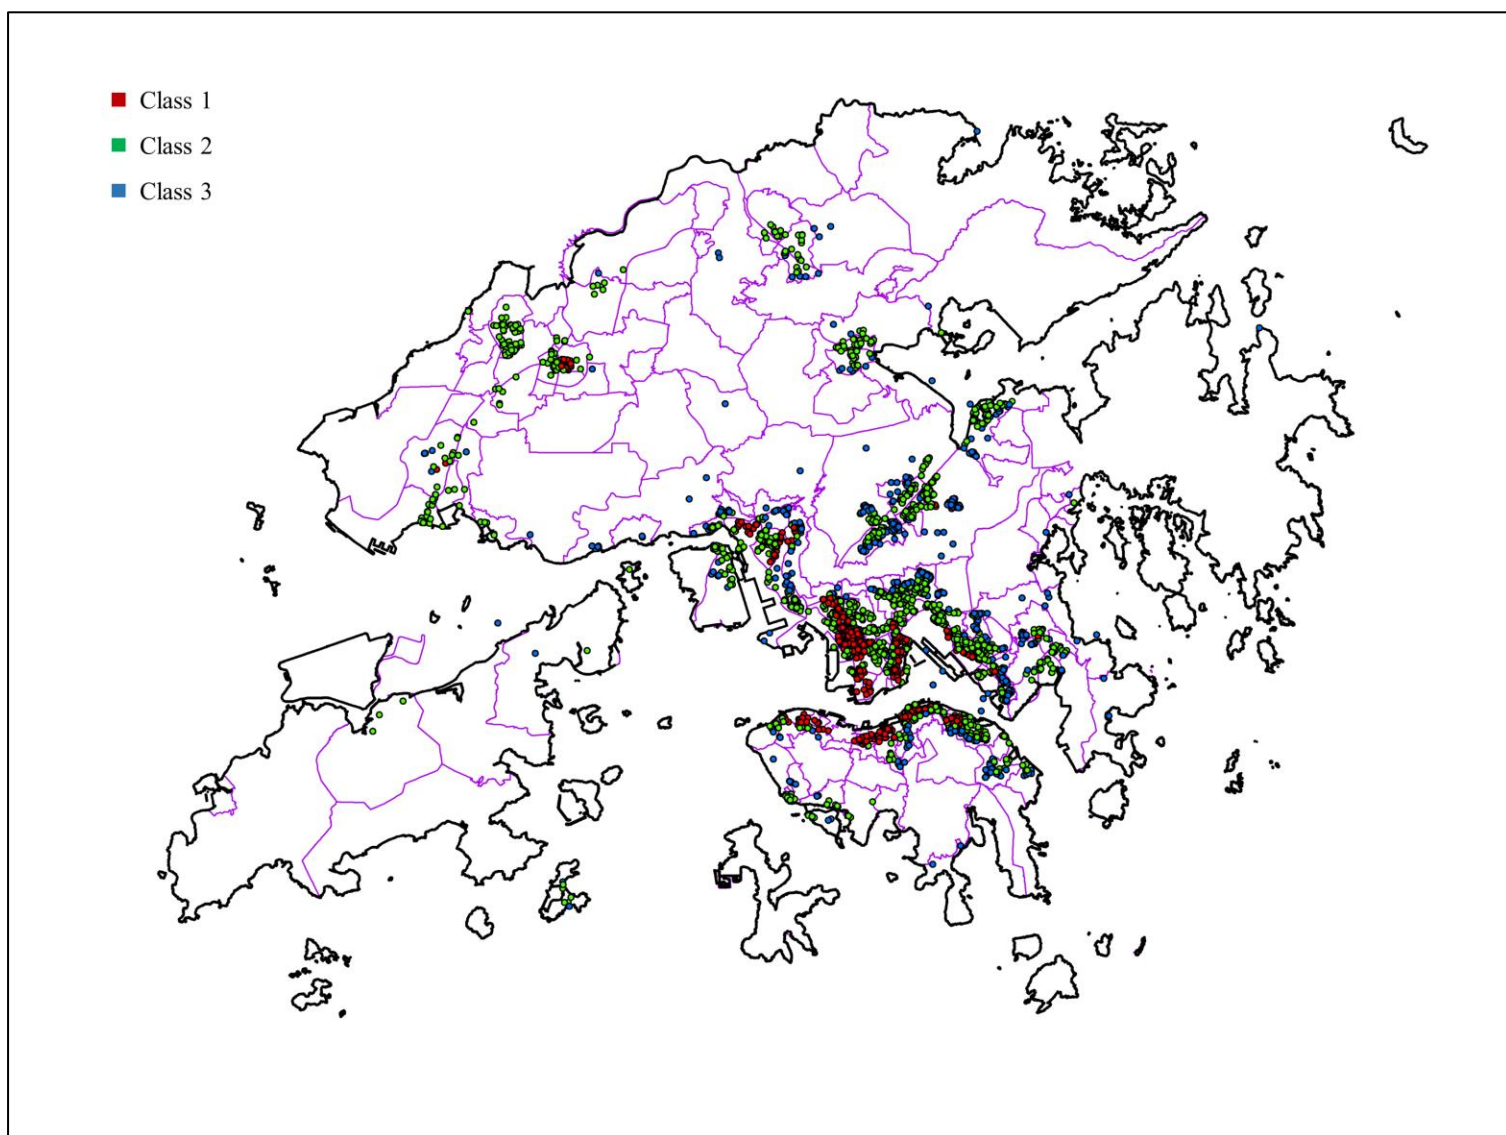

**Figure S1.** Geographical distribution of the participants' addresses at baseline.
